# Supplementary material for: Pentafluorophenyl-based single-chain polymer nanoparticles as a versatile platform towards protein mimicry
Source: Royal Society of Chemistry journal article supplement (doi:10.1039/d0py00922a), 2020-01-01
Supplement: d0py00922a1.pdf [file d0py00922a1.pdf]

# Pentafluorophenyl-based Single-Chain Polymer Nanoparticles as a Versatile Platform towards Protein Mimicry

A. Pia P. Kröger,<sup>a,†</sup> Jan-Willem D. Paats,<sup>a,†</sup> Roy J.E.A. Boonen,<sup>a</sup> Naomi M. Hamelmann<sup>a</sup> and Jos M. J. Paulusse<sup>a,b,\*</sup>

<sup>a</sup> Department of Biomolecular Nanotechnology, MESA+ Institute for Nanotechnology and TechMed Institute for Health and Biomedical Technologies, Faculty of Science and Technology, University of Twente, P.O. Box 217, 7500 AE Enschede, The Netherlands.

<sup>b</sup> Department of Nuclear Medicine and Molecular Imaging, University Medical Center Groningen, P.O. Box 30.001, 9700 RB Groningen, The Netherlands.

<sup>†</sup> These authors contributed equally.

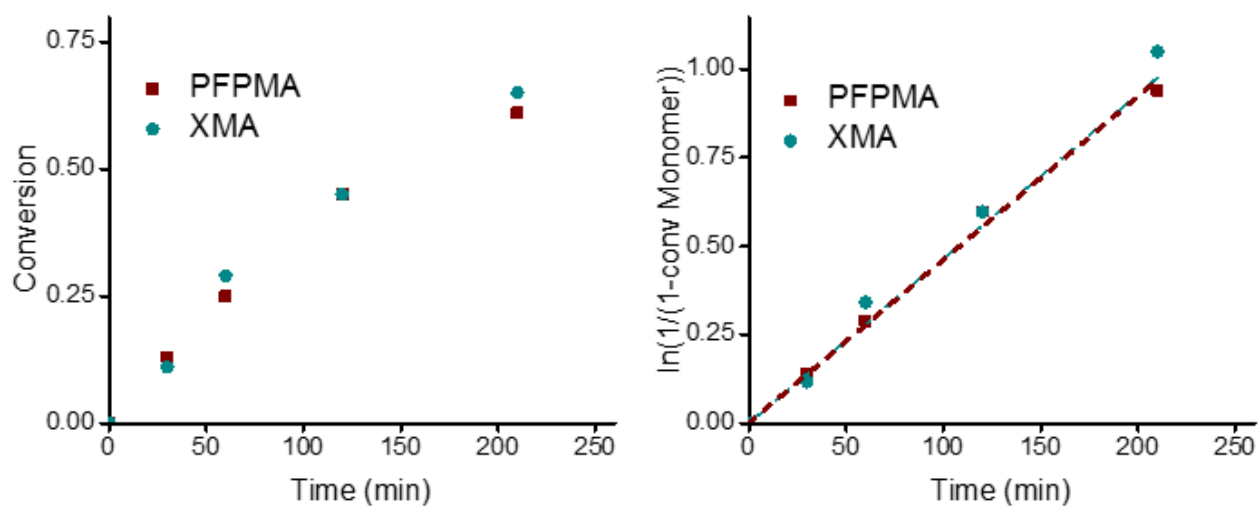

**Figure S1.** Conversion plots of p(PFPMA-XMA) polymerization.

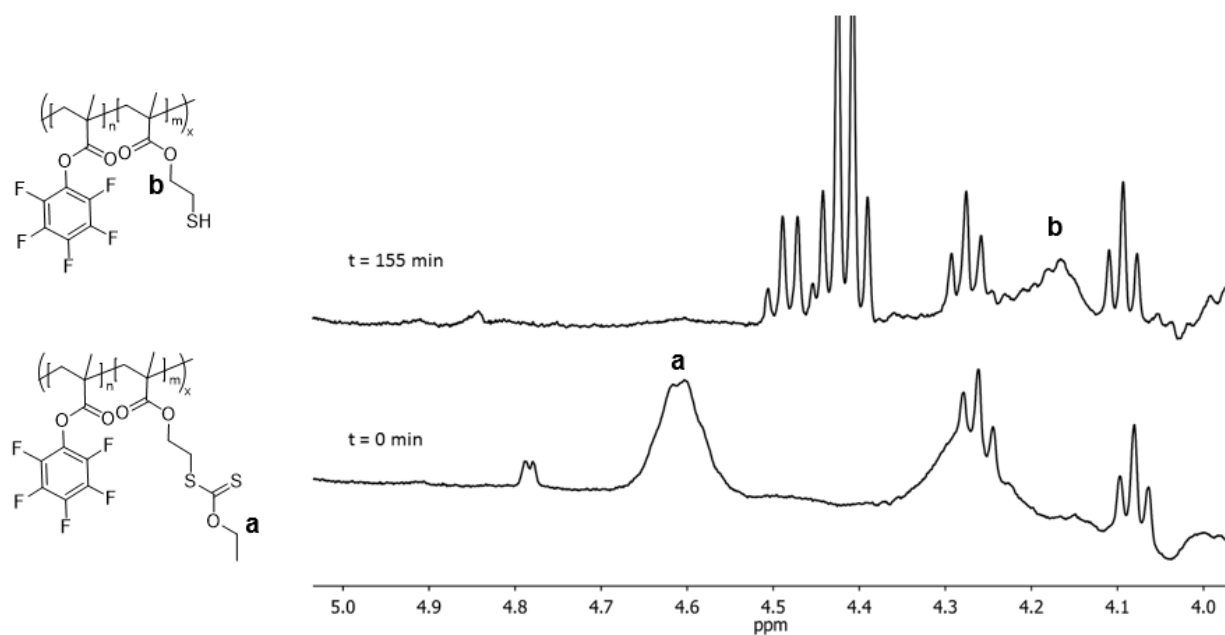

**Figure S2.**  $^1\text{H}$  NMR spectrum of the deprotection of XMA monomer in PFP-SCNP using ethanolamine. The signal at 4.6 ppm disappears, while a new signal appears at 4.2 ppm.

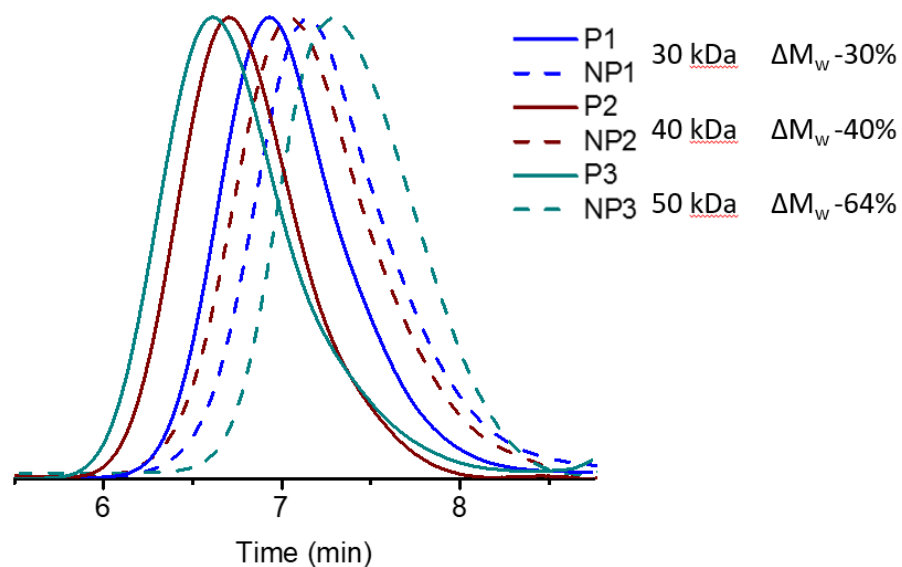

**Figure S3.** Overlay of GPC traces for the **PFP-polymer** precursors and the corresponding nanoparticles (**PFP-SCNPs**) for different precursor chain lengths.

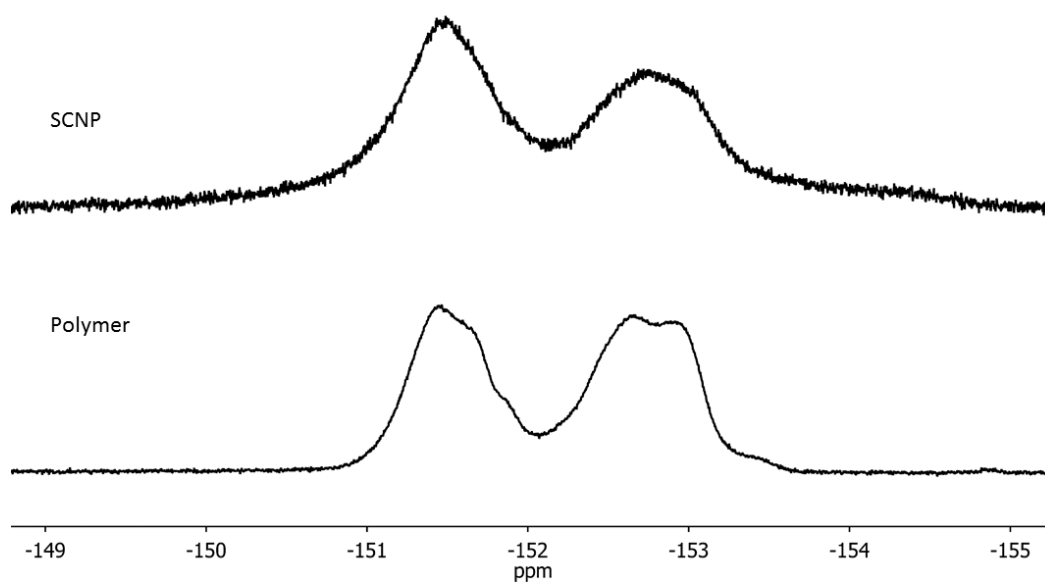

**Figure S4.** Comparison of  $^{19}\text{F}$  NMR spectra of precursor **PFP-polymer** and subsequent **PFP-SCNP**, showing the broadening of the *ortho*-fluoro signal.

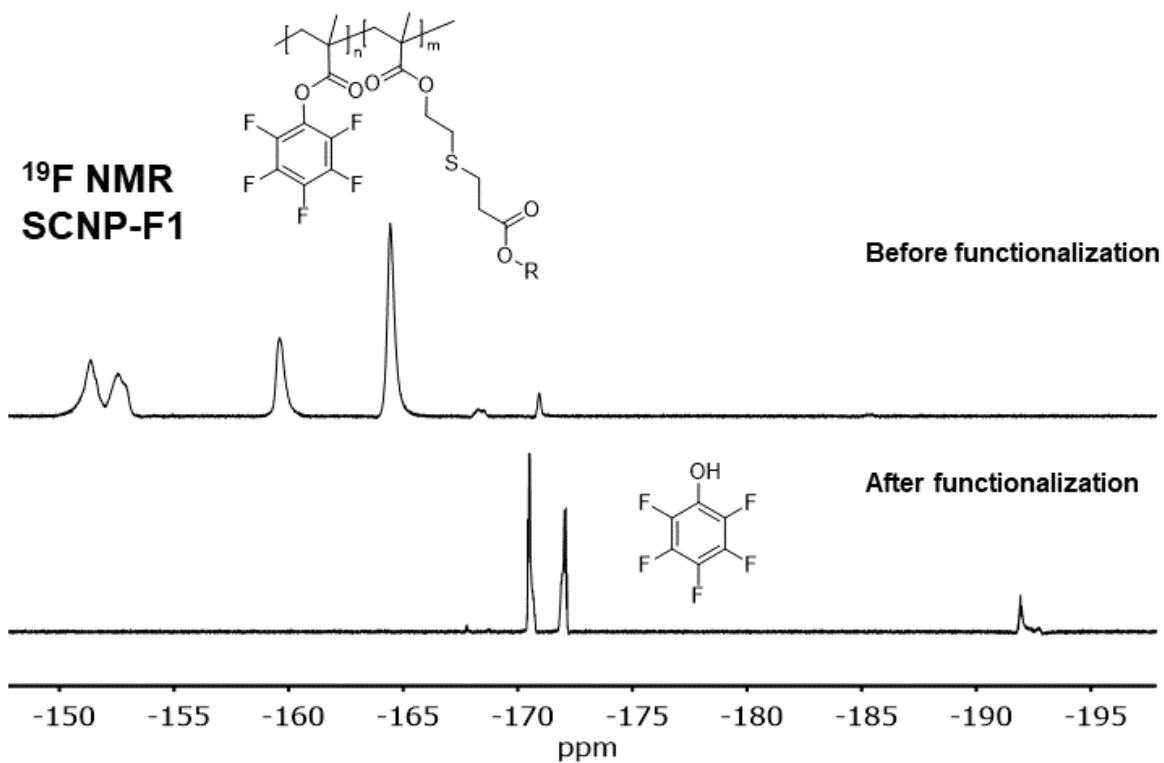

**Figure S5.** <sup>19</sup>F NMR spectrum of SCNP-F1 before and after functionalization with *n*-butylamine.

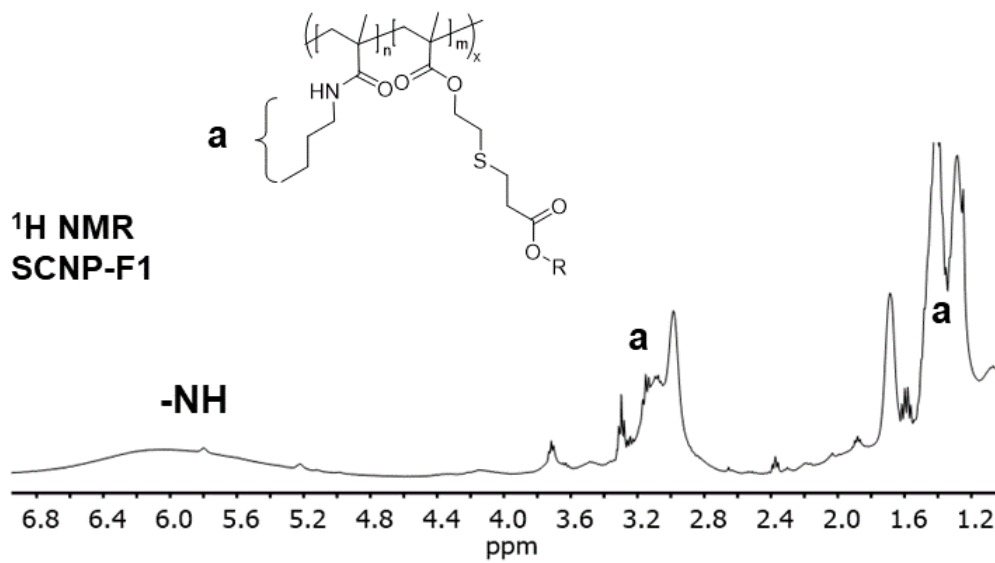

**Figure S6.** <sup>1</sup>H NMR spectrum of SCNP-F1, indicating the amide and butyl region.

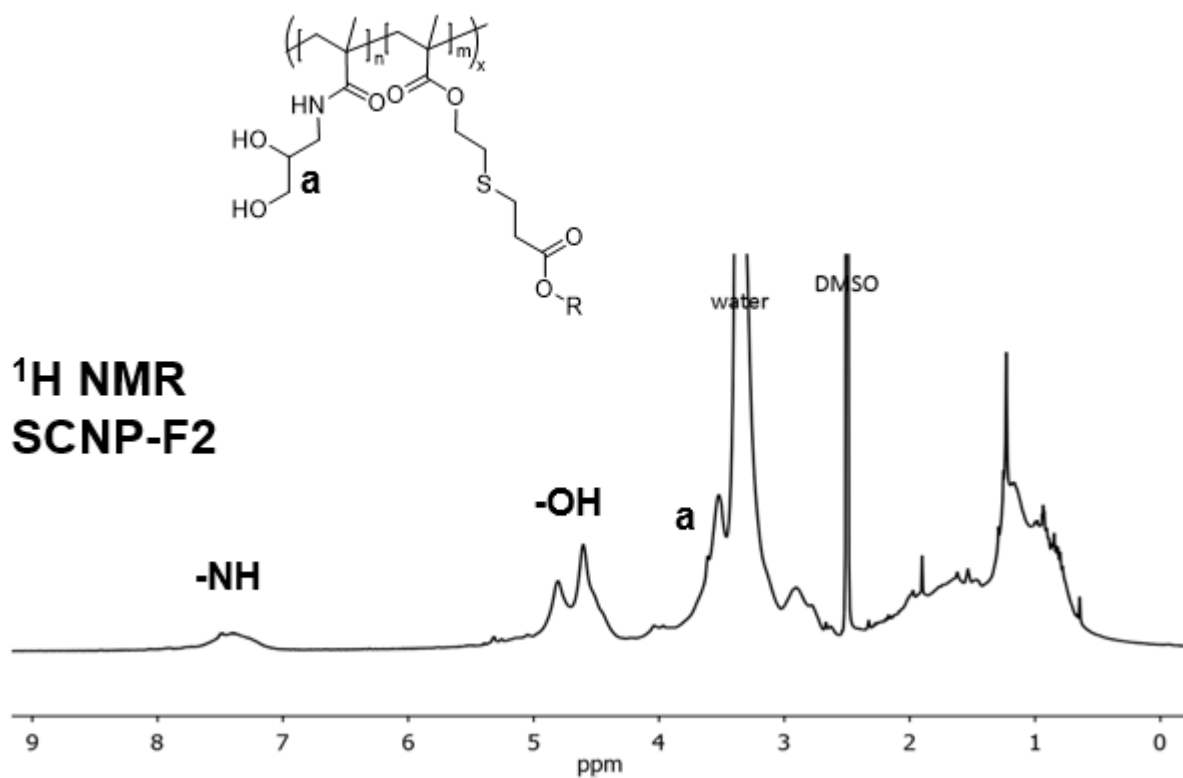

**Figure S7.** <sup>1</sup>H NMR spectrum of SCNP-F2.

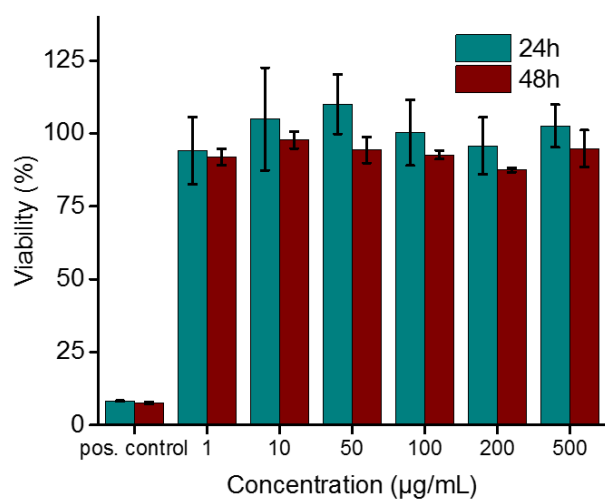

**Figure S8.** Cytotoxicity studies of SCNP-F2 on hCMEC/D3 cells.

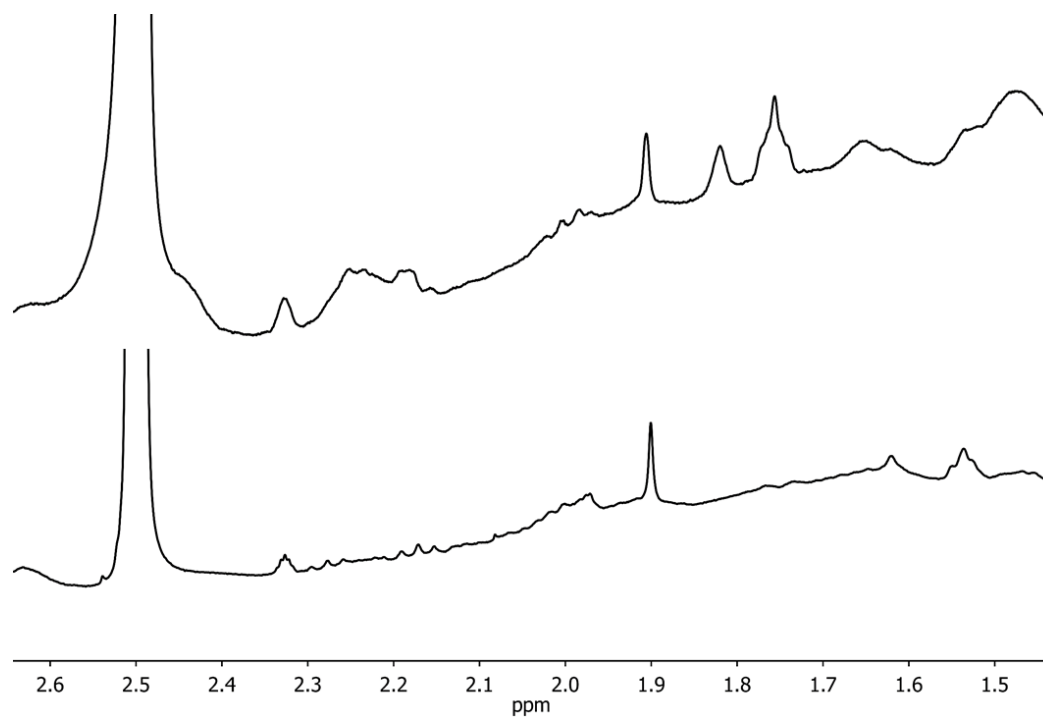

**Figure S9.** <sup>1</sup>H NMR spectra of SCNP-F2 (bottom) and SCNP-F3 (top).

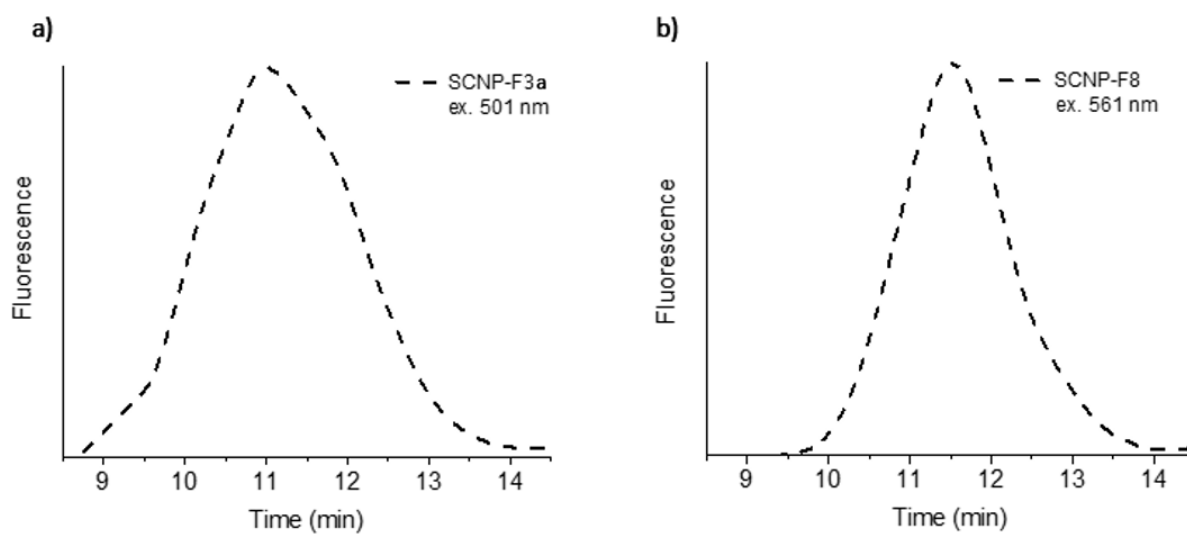

**Figure S10.** GPC traces of SCNP-F3a (a) and SCNP-F8 (b).

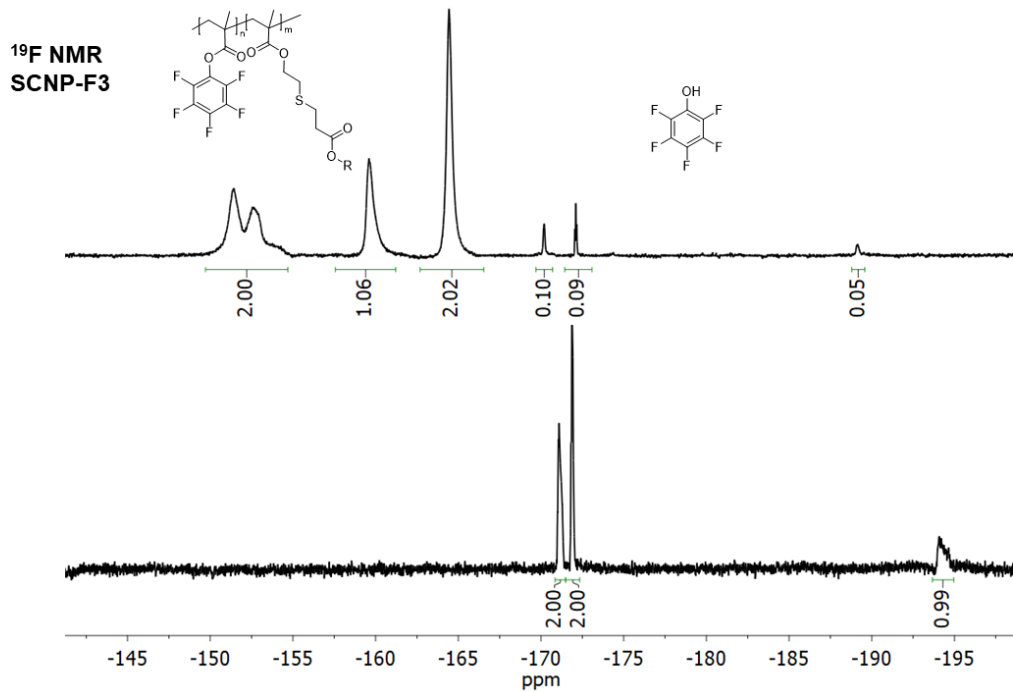

**Figure S11.** <sup>19</sup>F NMR spectra indicating 5% inclusion of tyrosine methyl ester and subsequent endcapping by 1-aminoglycerol releasing the remaining pentafluoro phenol.

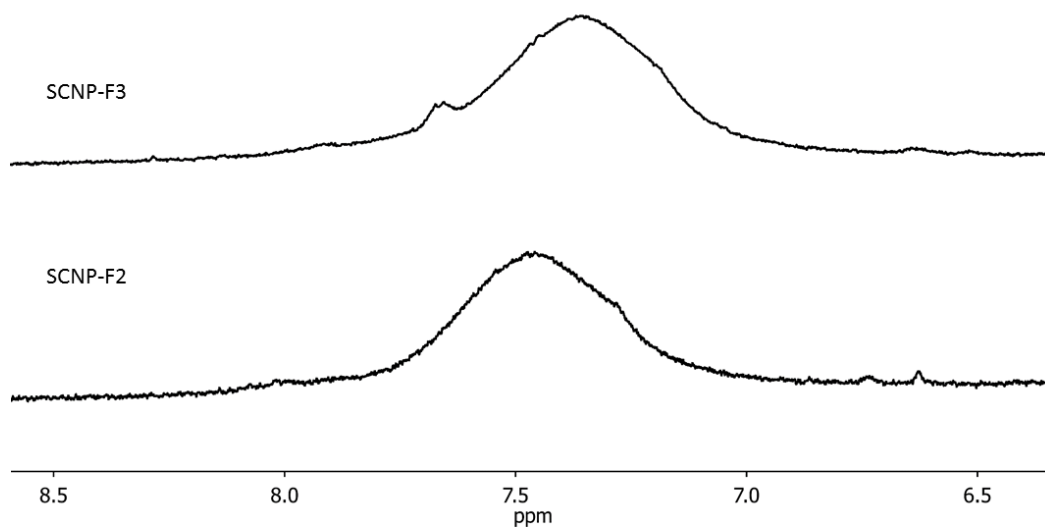

**Figure S12.** <sup>1</sup>H NMR spectra of SCNP-F2 (bottom) and SCNP-F3 (top), indicating the additional amide peak for the tyrosine methyl ester moiety.

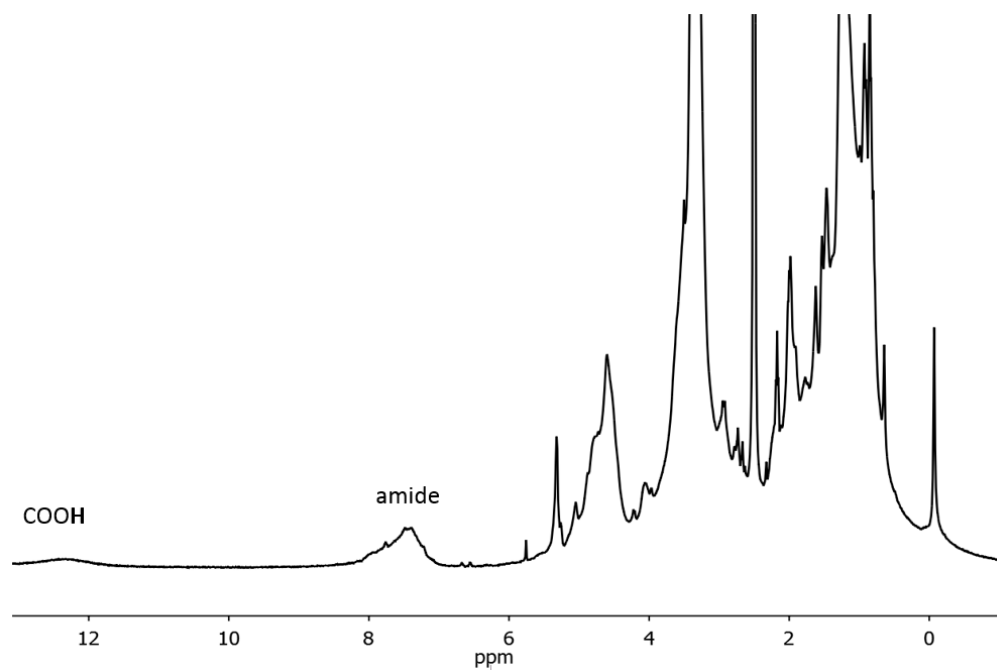

Figure S13.  $^1\text{H}$  NMR spectrum of SCNPF-F5.

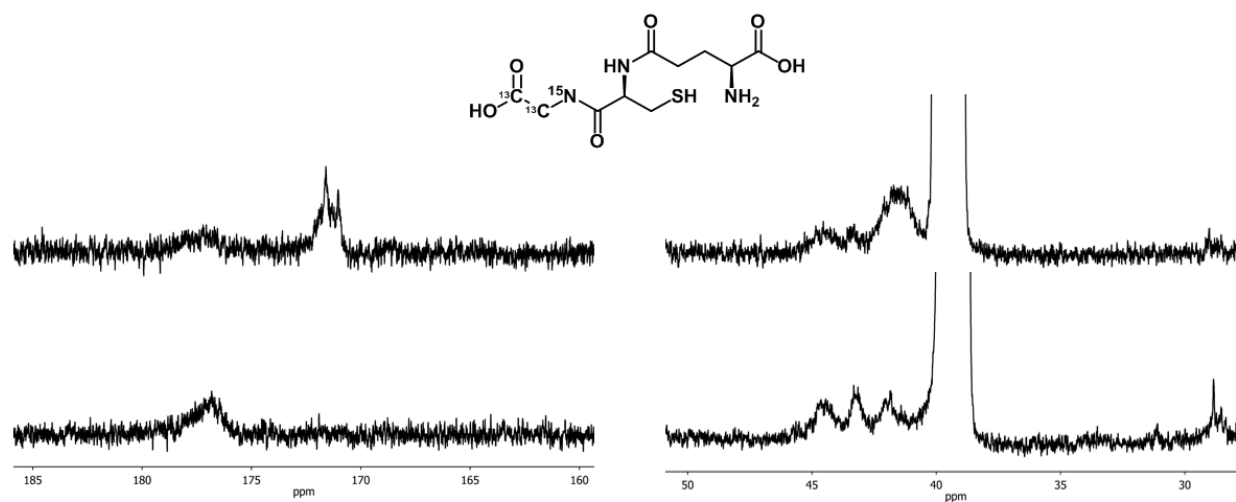

Figure S14.  $^{13}\text{C}$  NMR spectra of SCNPF-F2 (bottom) and SCNPF-F6 with 2% enriched GSH (top).
